# Supplementary material for: Relationship between histone modifications and transcription factor binding is protein family specific
Source: Genome Res. 2018 Mar;28(3):321–33. doi: 10.1101/gr.220079.116 (PMC5848611; doi:10.1101/gr.220079.116)
Supplement: Supplemental Material [file supp_gr.220079.116_Supplemental_Tables_S1-4.xlsx]

## Sheet: Supplemental Table 1
Supplemental Table S1: Data sources. Note that yellow color marks TFs whose ChIP-seq peaks summit do not coincides with motif center. Orange color marks TFs whose amount of aligned BSs is less than 700.
	Cell Type	Protein, Histone Modification, or DHS	Replicates	Download links for datasets used (Prefix in bold)	TF family
	http://hgdownload.cse.ucsc.edu/goldenPath/hg19/encodeDCC/wgEncodeAwgTfbsUniform/
44 TFs	GM12878	CEBPB	1	wgEncodeAwgTfbsHaibGm12878Cebpbsc150V0422111UniPk.narrowPeak.gz	bZIP
	GM12878	JUND	1	wgEncodeAwgTfbsSydhGm12878JundUniPk.narrowPeak.gz	bZIP
	GM12878	FOS	1	wgEncodeAwgTfbsSydhGm12878CfosUniPk.narrowPeak.gz	bZIP
	GM12878	NRF1	1	wgEncodeAwgTfbsSydhGm12878Nrf1IggmusUniPk.narrowPeak.gz	bZIP
	GM12878	BATF	1	wgEncodeAwgTfbsHaibGm12878BatfPcr1xUniPk.narrowPeak.gz	bZIP
	GM12878	CTCF	4	wgEncodeAwgTfbsBroadGm12878CtcfUniPk.narrowPeak.gz wgEncodeAwgTfbsSydhGm12878Ctcfsc15914c20UniPk.narrowPeak.gz wgEncodeAwgTfbsUtaGm12878CtcfUniPk.narrowPeak.gz wgEncodeAwgTfbsUwGm12878CtcfUniPk.narrowPeak.gz	C2H2
	GM12878	EGR1	1	wgEncodeAwgTfbsHaibGm12878Egr1Pcr2xUniPk.narrowPeak.gz	C2H2
	GM12878	REST	1	wgEncodeAwgTfbsHaibGm12878NrsfPcr1xUniPk.narrowPeak.gz	C2H2
	GM12878	SP1	1	wgEncodeAwgTfbsHaibGm12878Sp1Pcr1xUniPk.narrowPeak.gz	C2H2
	GM12878	YY1	2	wgEncodeAwgTfbsHaibGm12878Yy1sc281Pcr1xUniPk.narrowPeak.gz wgEncodeAwgTfbsSydhGm12878Yy1UniPk.narrowPeak.gz	C2H2
	GM12878	ZBTB33	1	wgEncodeAwgTfbsHaibGm12878Zbtb33Pcr1xUniPk.narrowPeak.gz	C2H2
	GM12878	ZNF143	1	wgEncodeAwgTfbsSydhGm12878Znf143166181apUniPk.narrowPeak.gz	C2H2
	GM12878	ELF1	1	wgEncodeAwgTfbsHaibGm12878Elf1sc631V0416101UniPk.narrowPeak.gz	ETS
	GM12878	ELK1	1	wgEncodeAwgTfbsSydhGm12878Elk112771IggmusUniPk.narrowPeak.gz	ETS
	GM12878	ETS1	1	wgEncodeAwgTfbsHaibGm12878Ets1Pcr1xUniPk.narrowPeak.gz	ETS
	GM12878	SPI1	1	wgEncodeAwgTfbsHaibGm12878Pu1Pcr1xUniPk.narrowPeak.gz	ETS
	GM12878	GABPA	1	wgEncodeAwgTfbsHaibGm12878GabpPcr2xUniPk.narrowPeak.gz	ETS
	GM12878	ZEB1	1	wgEncodeAwgTfbsHaibGm12878Zeb1sc25388V0416102UniPk.narrowPeak.gz	HD
	GM12878	POU2F2	1	wgEncodeAwgTfbsHaibGm12878Pou2f2Pcr1xUniPk.narrowPeak.gz	HD
	GM12878	MAX	1	wgEncodeAwgTfbsSydhGm12878MaxIggmusUniPk.narrowPeak.gz	bHLH
	GM12878	MYC	1	wgEncodeAwgTfbsUtaGm12878CmycUniPk.narrowPeak.gz	bHLH
	GM12878	TCF12	1	wgEncodeAwgTfbsHaibGm12878Tcf12Pcr1xUniPk.narrowPeak.gz	bHLH
	GM12878	USF1	1	wgEncodeAwgTfbsHaibGm12878Usf1Pcr2xUniPk.narrowPeak.gz	bHLH
	GM12878	USF2	1	wgEncodeAwgTfbsSydhGm12878Usf2IggmusUniPk.narrowPeak.gz	bHLH
	GM12878	BHLHE40	1	wgEncodeAwgTfbsSydhGm12878Bhlhe40cIggmusUniPk.narrowPeak.gz	bHLH
	GM12878	TCF3	1	wgEncodeAwgTfbsHaibGm12878Tcf3Pcr1xUniPk.narrowPeak.gz	bHLH
	GM12878	MEF2A	1	wgEncodeAwgTfbsHaibGm12878Mef2aPcr1xUniPk.narrowPeak.gz	MADS-domain
	GM12878	MEF2C	1	wgEncodeAwgTfbsHaibGm12878Mef2csc13268V0416101UniPk.narrowPeak.gz	MADS-domain
	GM12878	SRF	1	wgEncodeAwgTfbsHaibGm12878SrfPcr2xUniPk.narrowPeak.gz	MADS-domain
	GM12878	NR2C2	1	wgEncodeAwgTfbsSydhGm12878Tr4UniPk.narrowPeak.gz	Other
	GM12878	RXRA	1	wgEncodeAwgTfbsHaibGm12878RxraPcr1xUniPk.narrowPeak.gz	Other
	GM12878	E2F4	1	wgEncodeAwgTfbsSydhGm12878E2f4IggmusUniPk.narrowPeak.gz	Other
	GM12878	EBF1	2	wgEncodeAwgTfbsHaibGm12878Ebf1sc137065Pcr1xUniPk.narrowPeak.gz wgEncodeAwgTfbsSydhGm12878Ebf1sc137065UniPk.narrowPeak.gz	Other
	GM12878	NFYB	1	wgEncodeAwgTfbsSydhGm12878NfybIggmusUniPk.narrowPeak.gz	Other
	GM12878	NFIC	1	wgEncodeAwgTfbsHaibGm12878Nficsc81335V0422111UniPk.narrowPeak.gz	Other
	GM12878	NFYA	1	wgEncodeAwgTfbsSydhGm12878NfyaIggmusUniPk.narrowPeak.gz	Other
	GM12878	PAX5	2	wgEncodeAwgTfbsHaibGm12878Pax5c20Pcr1xUniPk.narrowPeak.gz wgEncodeAwgTfbsHaibGm12878Pax5n19Pcr1xUniPk.narrowPeak.gz	Other
	GM12878	RELA	1	wgEncodeAwgTfbsSydhGm12878NfkbTnfaIggrabUniPk.narrowPeak.gz	Other
	GM12878	RFX5	1	wgEncodeAwgTfbsSydhGm12878Rfx5200401194IggmusUniPk.narrowPeak.gz	Other
	GM12878	TBP	1	wgEncodeAwgTfbsSydhGm12878TbpIggmusUniPk.narrowPeak.gz	Other
	GM12878	BRCA1	1	wgEncodeAwgTfbsSydhGm12878Brca1a300IggmusUniPk.narrowPeak.gz	Other
	GM12878	STAT1	1	wgEncodeAwgTfbsSydhGm12878Stat1UniPk.narrowPeak.gz	STAT
	GM12878	STAT3	1	wgEncodeAwgTfbsSydhGm12878Stat3IggmusUniPk.narrowPeak.gz	STAT
	GM12878	STAT5A	1	wgEncodeAwgTfbsHaibGm12878Stat5asc74442V0422111UniPk.narrowPeak.gz	STAT
43 TFs	K562	CEBPB	2	wgEncodeAwgTfbsHaibK562Cebpbsc150V0422111UniPk.narrowPeak.gz wgEncodeAwgTfbsSydhK562CebpbIggrabUniPk.narrowPeak.gz	bZIP
	K562	FOS	1	wgEncodeAwgTfbsSydhK562CfosUniPk.narrowPeak.gz	bZIP
	K562	FOSL1	1	wgEncodeAwgTfbsHaibK562Fosl1sc183V0416101UniPk.narrowPeak.gz	bZIP
	K562	JUN	5	wgEncodeAwgTfbsSydhK562CjunIfna30UniPk.narrowPeak.gz wgEncodeAwgTfbsSydhK562CjunIfna6hUniPk.narrowPeak.gz wgEncodeAwgTfbsSydhK562CjunIfng30UniPk.narrowPeak.gz wgEncodeAwgTfbsSydhK562CjunIfng6hUniPk.narrowPeak.gz wgEncodeAwgTfbsSydhK562CjunUniPk.narrowPeak.gz	bZIP
	K562	JUND	1	wgEncodeAwgTfbsSydhK562JundIggrabUniPk.narrowPeak.gz	bZIP
	K562	MAFF	1	wgEncodeAwgTfbsSydhK562MaffIggrabUniPk.narrowPeak.gz	bZIP
	K562	NRF1	1	wgEncodeAwgTfbsSydhK562Nrf1IggrabUniPk.narrowPeak.gz	bZIP
	K562	MAFK	1	wgEncodeAwgTfbsSydhK562Mafkab50322IggrabUniPk.narrowPeak.gz	bZIP
	K562	CTCF	5	wgEncodeAwgTfbsBroadK562CtcfUniPk.narrowPeak.gz wgEncodeAwgTfbsHaibK562CtcfcPcr1xUniPk.narrowPeak.gz wgEncodeAwgTfbsSydhK562CtcfbIggrabUniPk.narrowPeak.gz wgEncodeAwgTfbsUtaK562CtcfUniPk.narrowPeak.gz wgEncodeAwgTfbsUwK562CtcfUniPk.narrowPeak.gz	C2H2
	K562	REST	1	wgEncodeAwgTfbsHaibK562NrsfV0416102UniPk.narrowPeak.gz	C2H2
	K562	SP1	1	wgEncodeAwgTfbsHaibK562Sp1Pcr1xUniPk.narrowPeak.gz	C2H2
	K562	SP2	1	wgEncodeAwgTfbsHaibK562Sp2sc643V0416102UniPk.narrowPeak.gz	C2H2
	K562	YY1	3	wgEncodeAwgTfbsHaibK562Yy1V0416101UniPk.narrowPeak.gz wgEncodeAwgTfbsHaibK562Yy1V0416102UniPk.narrowPeak.gz wgEncodeAwgTfbsSydhK562Yy1UcdUniPk.narrowPeak.gz	C2H2
	K562	ZBTB33	1	wgEncodeAwgTfbsHaibK562Zbtb33Pcr1xUniPk.narrowPeak.gz	C2H2
	K562	ZNF143	1	wgEncodeAwgTfbsSydhK562Znf143IggrabUniPk.narrowPeak.gz	C2H2
	K562	ZNF263	1	wgEncodeAwgTfbsSydhK562Znf263UcdUniPk.narrowPeak.gz	C2H2
	K562	EGR1	1	wgEncodeAwgTfbsHaibK562Egr1V0416101UniPk.narrowPeak.gz	C2H2
	K562	ELF1	1	wgEncodeAwgTfbsHaibK562Elf1sc631V0416102UniPk.narrowPeak.gz	ETS
	K562	ELK1	1	wgEncodeAwgTfbsSydhK562Elk112771IggrabUniPk.narrowPeak.gz	ETS
	K562	ETS1	1	wgEncodeAwgTfbsHaibK562Ets1V0416101UniPk.narrowPeak.gz	ETS
	K562	GABPA	1	wgEncodeAwgTfbsHaibK562GabpV0416101UniPk.narrowPeak.gz	ETS
	K562	SPI1	1	wgEncodeAwgTfbsHaibK562Pu1Pcr1xUniPk.narrowPeak.gz	ETS
	K562	GATA1	1	wgEncodeAwgTfbsSydhK562Gata1UcdUniPk.narrowPeak.gz	GATA
	K562	GATA2	2	wgEncodeAwgTfbsHaibK562Gata2sc267Pcr1xUniPk.narrowPeak.gz wgEncodeAwgTfbsSydhK562Gata2UcdUniPk.narrowPeak.gz	GATA
	K562	BHLHE40	1	wgEncodeAwgTfbsSydhK562Bhlhe40nb100IggrabUniPk.narrowPeak.gz	bHLH
	K562	MAX	2	wgEncodeAwgTfbsHaibK562MaxV0416102UniPk.narrowPeak.gz wgEncodeAwgTfbsSydhK562MaxIggrabUniPk.narrowPeak.gz	bHLH
	K562	MYC	7	wgEncodeAwgTfbsSydhK562CmycIfna30UniPk.narrowPeak.gz wgEncodeAwgTfbsSydhK562CmycIfna6hUniPk.narrowPeak.gz wgEncodeAwgTfbsSydhK562CmycIfng30UniPk.narrowPeak.gz wgEncodeAwgTfbsSydhK562CmycIfng6hUniPk.narrowPeak.gz wgEncodeAwgTfbsSydhK562CmycIggrabUniPk.narrowPeak.gz wgEncodeAwgTfbsSydhK562CmycUniPk.narrowPeak.gz wgEncodeAwgTfbsUtaK562CmycUniPk.narrowPeak.gz	bHLH
	K562	USF1	1	wgEncodeAwgTfbsHaibK562Usf1V0416101UniPk.narrowPeak.gz	bHLH
	K562	USF2	1	wgEncodeAwgTfbsSydhK562Usf2IggrabUniPk.narrowPeak.gz	bHLH
	K562	MEF2A	1	wgEncodeAwgTfbsHaibK562Mef2aV0416101UniPk.narrowPeak.gz	MADS-domain
	K562	SRF	1	wgEncodeAwgTfbsHaibK562SrfV0416101UniPk.narrowPeak.gz	MADS-domain
	K562	ARID3A	1	wgEncodeAwgTfbsSydhK562Arid3asc8821IggrabUniPk.narrowPeak.gz	Other
	K562	NR2C2	1	wgEncodeAwgTfbsSydhK562Tr4UcdUniPk.narrowPeak.gz	Other
	K562	IRF1	4	wgEncodeAwgTfbsSydhK562Irf1Ifna30UniPk.narrowPeak.gz wgEncodeAwgTfbsSydhK562Irf1Ifna6hUniPk.narrowPeak.gz wgEncodeAwgTfbsSydhK562Irf1Ifng30UniPk.narrowPeak.gz wgEncodeAwgTfbsSydhK562Irf1Ifng6hUniPk.narrowPeak.gz	Other
	K562	NFYA	1	wgEncodeAwgTfbsSydhK562NfyaUniPk.narrowPeak.gz	Other
	K562	NFYB	1	wgEncodeAwgTfbsSydhK562NfybUniPk.narrowPeak.gz	Other
	K562	RFX5	1	wgEncodeAwgTfbsSydhK562Rfx5IggrabUniPk.narrowPeak.gz	Other
	K562	E2F4	1	wgEncodeAwgTfbsSydhK562E2f4UcdUniPk.narrowPeak.gz	Other
	K562	E2F6	2	wgEncodeAwgTfbsHaibK562E2f6V0416102UniPk.narrowPeak.gz wgEncodeAwgTfbsSydhK562E2f6UcdUniPk.narrowPeak.gz	Other
	K562	TBP	1	wgEncodeAwgTfbsSydhK562TbpIggmusUniPk.narrowPeak.gz	Other
	K562	THAP1	1	wgEncodeAwgTfbsHaibK562Thap1sc98174V0416101UniPk.narrowPeak.gz	Other
	K562	STAT1	4	wgEncodeAwgTfbsSydhK562Stat1Ifna30UniPk.narrowPeak.gz wgEncodeAwgTfbsSydhK562Stat1Ifna6hUniPk.narrowPeak.gz wgEncodeAwgTfbsSydhK562Stat1Ifng30UniPk.narrowPeak.gz wgEncodeAwgTfbsSydhK562Stat1Ifng6hUniPk.narrowPeak.gz	STAT
	K562	STAT5A	1	wgEncodeAwgTfbsHaibK562Stat5asc74442V0422111UniPk.narrowPeak.gz	STAT
24 TFs	H1-hESC	CEBPB	1	wgEncodeAwgTfbsSydhH1hescCebpbIggrabUniPk.narrowPeak.gz	bZIP
	H1-hESC	FOSL1	1	wgEncodeAwgTfbsHaibH1hescFosl1sc183V0416102UniPk.narrowPeak.gz	bZIP
	H1-hESC	NRF1	1	wgEncodeAwgTfbsSydhH1hescNrf1IggrabUniPk.narrowPeak.gz	bZIP
	H1-hESC	JUN	1	wgEncodeAwgTfbsSydhH1hescCjunIggrabUniPk.narrowPeak.gz	bZIP
	H1-hESC	JUND	2	wgEncodeAwgTfbsHaibH1hescJundV0416102UniPk.narrowPeak.gz wgEncodeAwgTfbsSydhH1hescJundIggrabUniPk.narrowPeak.gz	bZIP
	H1-hESC	MAFK	1	wgEncodeAwgTfbsSydhH1hescMafkIggrabUniPk.narrowPeak.gz	bZIP
	H1-hESC	CTCF	3	wgEncodeAwgTfbsBroadH1hescCtcfUniPk.narrowPeak.gz wgEncodeAwgTfbsHaibH1hescCtcfsc5916V0416102UniPk.narrowPeak.gz wgEncodeAwgTfbsHaibH1hescTcf12Pcr1xUniPk.narrowPeak.gz	C2H2
	H1-hESC	REST	1	wgEncodeAwgTfbsHaibH1hescNrsfV0416102UniPk.narrowPeak.gz	C2H2
	H1-hESC	SP1	1	wgEncodeAwgTfbsHaibH1hescSp1Pcr1xUniPk.narrowPeak.gz	C2H2
	H1-hESC	SP2	1	wgEncodeAwgTfbsHaibH1hescSp2V0422111UniPk.narrowPeak.gz	C2H2
	h1-hESC	EGR1	1	wgEncodeAwgTfbsHaibH1hescEgr1V0416102UniPk.narrowPeak.gz	C2H2
	H1-hESC	YY1	1	wgEncodeAwgTfbsHaibH1hescYy1sc281V0416102UniPk.narrowPeak.gz	C2H2
	H1-hESC	ZNF143	1	wgEncodeAwgTfbsSydhH1hescZnf143IggrabUniPk.narrowPeak.gz	C2H2
	H1-hESC	MYC	2	wgEncodeAwgTfbsSydhH1hescCmycIggrabUniPk.narrowPeak.gz wgEncodeAwgTfbsUtaH1hescCmycUniPk.narrowPeak.gz	bHLH
	H1-hESC	MAX	1	wgEncodeAwgTfbsSydhH1hescMaxUcdUniPk.narrowPeak.gz	bHLH
	H1-hESC	TCF12	1	wgEncodeAwgTfbsHaibH1hescTcf12Pcr1xUniPk.narrowPeak.gz	bHLH
	H1-hESC	USF1	1	wgEncodeAwgTfbsHaibH1hescUsf1Pcr1xUniPk.narrowPeak.gz	bHLH
	H1-hESC	USF2	1	wgEncodeAwgTfbsSydhH1hescUsf2IggrabUniPk.narrowPeak.gz	bHLH
	H1-hESC	GABPA	1	wgEncodeAwgTfbsHaibH1hescGabpPcr1xUniPk.narrowPeak.gz	Other
	H1-hESC	RXRA	1	wgEncodeAwgTfbsHaibH1hescRxraV0416102UniPk.narrowPeak.gz	Other
	H1-hESC	SRF	1	wgEncodeAwgTfbsHaibH1hescSrfPcr1xUniPk.narrowPeak.gz	Other
	H1-hESC	BRCA1	1	wgEncodeAwgTfbsSydhH1hescBrca1IggrabUniPk.narrowPeak.gz	Other
	H1-hESC	RFX5	1	wgEncodeAwgTfbsSydhH1hescRfx5200401194IggrabUniPk.narrowPeak.gz	Other
	H1-hESC	TBP	1	wgEncodeAwgTfbsSydhH1hescTbpIggrabUniPk.narrowPeak.gz	Other
http://hgdownload.cse.ucsc.edu/goldenPath/hg19/encodeDCC/wgEncodeBroadHistone/
10 HMs	GM12878	H3K4me2	2	wgEncodeBroadHistoneGm12878H3k4me2StdAlnRep1.bam wgEncodeBroadHistoneGm12878H3k4me2StdAlnRep2.bam
	GM12879	H3K27ac	2	wgEncodeBroadHistoneGm12878H3k27acStdAlnRep1.bam wgEncodeBroadHistoneGm12878H3k27acStdAlnRep2.bam
	GM12880	H3K27me3	2	wgEncodeBroadHistoneGm12878H3k27me3StdAlnRep1.bam wgEncodeBroadHistoneGm12878H3k27me3StdAlnRep2.bam
	GM12881	H3K36me3	2	wgEncodeBroadHistoneGm12878H3k36me3StdAlnRep1.bam wgEncodeBroadHistoneGm12878H3k36me3StdAlnRep2.bam
	GM12882	H3K4me1	2	wgEncodeBroadHistoneGm12878H3k4me1StdAlnRep1.bam wgEncodeBroadHistoneGm12878H3k4me1StdAlnRep2.bam
	GM12883	H3K4me3	2	wgEncodeBroadHistoneGm12878H3k4me3StdAlnRep1.bam wgEncodeBroadHistoneGm12878H3k4me3StdAlnRep2.bam
	GM12884	H3K79me2	2	wgEncodeBroadHistoneGm12878H3k79me2StdAlnRep1.bam wgEncodeBroadHistoneGm12878H3k79me2StdAlnRep2.bam
	GM12885	H3K9ac	2	wgEncodeBroadHistoneGm12878H3k9acStdAlnRep1.bam wgEncodeBroadHistoneGm12878H3k9acStdAlnRep2.bam
	GM12886	H4K20me1	2	wgEncodeBroadHistoneGm12878H4k20me1StdAlnRep1.bam wgEncodeBroadHistoneGm12878H4k20me1StdAlnRep2.bam
	GM12887	H3K9me3	3	wgEncodeBroadHistoneGm12878H3k9me3StdAlnRep1.bam wgEncodeBroadHistoneGm12878H3k9me3StdAlnRep2.bam wgEncodeBroadHistoneGm12878H3k9me3StdAlnRep3.bam
10 HMs	K562	H3K4me2	2	wgEncodeBroadHistoneK562H3k4me2StdAlnRep1.bam wgEncodeBroadHistoneK562H3k4me2StdAlnRep2.bam
	K562	H3K27ac	2	wgEncodeBroadHistoneK562H3k27acStdAlnRep1.bam wgEncodeBroadHistoneK562H3k27acStdAlnRep2.bam
	K562	H3K27me3	2	wgEncodeBroadHistoneK562H3k27me3StdAlnRep1.bam wgEncodeBroadHistoneK562H3k27me3StdAlnRep2.bam
	K562	H3K36me3	2	wgEncodeBroadHistoneK562H3k36me3StdAlnRep1.bam wgEncodeBroadHistoneK562H3k36me3StdAlnRep2.bam
	K562	H3K4me1	2	wgEncodeBroadHistoneK562H3k4me1StdAlnRep1.bam wgEncodeBroadHistoneK562H3k4me1StdAlnRep2.bam
	K562	H3K4me3	2	wgEncodeBroadHistoneK562H3k4me3StdAlnRep1.bam wgEncodeBroadHistoneK562H3k4me3StdAlnRep2.bam
	K562	H3K79me2	2	wgEncodeBroadHistoneK562H3k79me2StdAlnRep1.bam wgEncodeBroadHistoneK562H3k79me2StdAlnRep2.bam
	K562	H3K9ac	2	wgEncodeBroadHistoneK562H3k9acStdAlnRep1.bam wgEncodeBroadHistoneK562H3k9acStdAlnRep2.bam
	K562	H4K20me1	2	wgEncodeBroadHistoneK562H4k20me1StdAlnRep1.bam wgEncodeBroadHistoneK562H4k20me1StdAlnRep2.bam
	K562	H3K9me3	2	wgEncodeBroadHistoneK562H3k9me3StdAlnRep1.bam wgEncodeBroadHistoneK562H3k9me3StdAlnRep2.bam
10 HMs	H1-hESC	H3K4me2	2	wgEncodeBroadHistoneH1hescH3k4me2StdAlnRep1.bam wgEncodeBroadHistoneH1hescH3k4me2StdAlnRep2.bam
	H1-hESC	H3K27ac	2	wgEncodeBroadHistoneH1hescH3k27acStdAlnRep1.bam wgEncodeBroadHistoneH1hescH3k27acStdAlnRep2.bam
	H1-hESC	H3K27me3	2	wgEncodeBroadHistoneH1hescH3k27me3StdAlnRep1.bam wgEncodeBroadHistoneH1hescH3k27me3StdAlnRep2.bam
	H1-hESC	H3K36me3	2	wgEncodeBroadHistoneH1hescH3k36me3StdAlnRep1.bam wgEncodeBroadHistoneH1hescH3k36me3StdAlnRep2.bam
	H1-hESC	H3K4me1	2	wgEncodeBroadHistoneH1hescH3k4me1StdAlnRep1.bam wgEncodeBroadHistoneH1hescH3k4me1StdAlnRep2.bam
	H1-hESC	H3K4me3	2	wgEncodeBroadHistoneH1hescH3k4me3StdAlnRep1.bam wgEncodeBroadHistoneH1hescH3k4me3StdAlnRep2.bam
	H1-hESC	H3K79me2	2	wgEncodeBroadHistoneH1hescH3k79me2StdAlnRep1.bam wgEncodeBroadHistoneH1hescH3k79me2StdAlnRep2.bam
	H1-hESC	H3K9ac	2	wgEncodeBroadHistoneH1hescH3k9acStdAlnRep1.bam wgEncodeBroadHistoneH1hescH3k9acStdAlnRep2.bam
	H1-hESC	H4K20me1	2	wgEncodeBroadHistoneH1hescH4k20me1StdAlnRep1.bam wgEncodeBroadHistoneH1hescH4k20me1StdAlnRep2.bam
	H1-hESC	H3K9me3	2	wgEncodeBroadHistoneH1hescH3k09me3StdAlnRep1.bam wgEncodeBroadHistoneH1hescH3k09me3StdAlnRep2.bam
http://hgdownload.cse.ucsc.edu/goldenPath/hg19/encodeDCC/wgEncodeAwgDnaseUniform/
Dnase-seq	GM12878	DHS	1	wgEncodeAwgDnaseUwdukeGm12878UniPk.narrowPeak.gz
	H1-hESC	DHS	1	wgEncodeAwgDnaseUwdukeH1hescUniPk.narrowPeak.gz
	K562	DHS	1	wgEncodeAwgDnaseUwdukeK562UniPk.narrowPeak.gz
http://hgdownload.cse.ucsc.edu/goldenpath/hg19/encodeDCC/wgEncodeSydhNsome/
MNase-seq	GM12878		1	wgEncodeSydhNsomeGm12878Sig.bigWig
	K562		1	wgEncodeSydhNsomeK562Sig.bigWig
.bam files for Dnase-seq data
Dnase-seq	GM12878	DHS	1	https://www.ncbi.nlm.nih.gov/geo/download/?acc=GSM816665&format=file&file=GSM816665%5Fhg19%5FwgEncodeOpenChromDnaseGm12878Sig%2EbigWig
	H1-hESC	DHS	1	https://www.ncbi.nlm.nih.gov/geo/download/?acc=GSM816632&format=file&file=GSM816632%5Fhg19%5FwgEncodeOpenChromDnaseH1hescSig%2EbigWig
	K562	DHS	1	https://www.ncbi.nlm.nih.gov/geo/download/?acc=GSM816655&format=file&file=GSM816655%5Fhg19%5FwgEncodeOpenChromDnaseK562SigV2%2EbigWig

## Sheet: Supplemental Table 2
Supplemental Table S2: Percentage of BSs overlapped between two cell lines or among three cell lines for each TF.
	%BSs overlaps between
	GM12878 & K562	GM12878 & H1-hESC	K562 & H1-hESC	GM12878 & K562 & H1-hESC
BATF	NA | NA	NA | NA	NA | NA	NA | NA | NA
BHLHE40	30.19% | 21.05%	NA | NA	NA | NA	NA | NA | NA
CEBPB	4.19% | 1.54%	4.97% | 1.63%	20.9% | 18.52%	1.83% | 0.68% | 0.6%
CTCF	33.62% | 28.1%	37.12% | 16.93%	40.51% | 22.11%	25.76% | 21.53% | 11.75%
E2F4	63.06% | 25.27%	NA | NA	NA | NA	NA | NA | NA
EBF1	NA | NA	NA | NA	NA | NA	NA | NA | NA
EGR1	53.88% | 24.93%	23.06% | 35.85%	13.01% | 43.71%	17.23% | 7.97% | 26.79%
ELF1	41.15% | 31.13%	NA | NA	NA | NA	NA | NA | NA
ELK1	49.64% | 78.16%	NA | NA	NA | NA	NA | NA | NA
ETS1	22.1% | 11.02%	NA | NA	NA | NA	NA | NA | NA
GABPA	83.89% | 52.2%	47.7% | 73.12%	31.44% | 77.44%	45.91% | 28.57% | 70.37%
JUND	15.97% | 2.45%	5.64% | 1.63%	10.35% | 19.46%	2.34% | 0.36% | 0.68%
MAX	13.33% | 6.43%	33.06% | 20.69%	11.17% | 14.48%	4.81% | 2.32% | 3.01%
MEF2A	1.97% | 4.95%	NA | NA	NA | NA	NA | NA | NA
MEF2C	NA | NA	NA | NA	NA | NA	NA | NA | NA
MYC	26.68% | 5.98%	38.73% | 27.51%	11.68% | 36.98%	13.6% | 3.05% | 9.66%
NFYB	42.23% | 28.88%	NA | NA	NA | NA	NA | NA | NA
NRF1	61.68% | 82.07%	65.51% | 77.34%	74.15% | 65.8%	52.16% | 69.4% | 61.58%
PAX5	NA | NA	NA | NA	NA | NA	NA | NA | NA
POU2F2	NA | NA	NA | NA	NA | NA	NA | NA | NA
RELA	NA | NA	NA | NA	NA | NA	NA | NA | NA
RFX5	14.42% | 27.88%	16.61% | 18.66%	27.88% | 16.2%	5.33% | 10.3% | 5.99%
SP1	26.9% | 51.98%	32.63% | 34.84%	48.48% | 26.79%	18.68% | 36.1% | 19.95%
SPI1	9.52% | 11.29%	NA | NA	NA | NA	NA | NA | NA
STAT5A	7.26% | 3.18%	NA | NA	NA | NA	NA | NA | NA
TCF12	NA | NA	8.35% | 24.38%	NA | NA	NA | NA | NA
TCF3	NA | NA	NA | NA	NA | NA	NA | NA | NA
USF1	26.39% | 28.66%	31.26% | 26.28%	39.91% | 30.89%	17.41% | 18.91% | 14.64%
USF2	28.95% | 63.92%	40.07% | 44.14%	68.56% | 34.21%	25.1% | 55.42% | 27.65%
YY1	27.51% | 25.33%	32.74% | 24.72%	28.9% | 23.7%	16.59% | 15.28% | 12.52%
ZBTB33	21.67% | 14.77%	NA | NA	NA | NA	NA | NA | NA
ZEB1	NA | NA	NA | NA	NA | NA	NA | NA | NA
ZNF143	37.88% | 33.56%	35.61% | 26.86%	21.48% | 18.29%	10.61% | 9.4% | 8.0%

## Sheet: Supplemental Table 3
Supplemental Table S3: Statistics of BSs and non-BSs for each TF in three cell lines.
GM12878							K562							H1-hESC
	# of BSs	# of non-BSs	Length of BSs	Binding energy	%GC			# of BSs	# of non-BSs	Length of BSs	Binding energy	%GC			# of BSs	# of non-BSs	Length of BSs	Binding energy	%GC
BATF	5444	5448	11	13.6866	37		BHLHE40	6014	6014	11	12.8385	61		CEBPB	2338	2339	11	13.6019	39
BHLHE40	4194	3977	11	12.6611	61		CEBPB	2072	2072	11	13.8206	39		CTCF	502	504	19	13.9229	67
CEBPB	764	764	11	12.9384	36		CTCF	274	283	19	14.4004	67		EGR1	5816	5815	14	14.0411	83
CTCF	229	230	19	14.5993	66		E2F4	5046	5046	11	12.4363	80		GABPA	2757	2757	11	13.4029	67
E2F4	2022	2021	11	12.7248	77		E2F6	11494	10891	11	12.9165	73		JUN	592	581	13	13.3413	48
EBF1	16395	16395	11	13.3868	68		EGR1	19540	17481	14	13.6421	80		JUND	3987	3982	11	14.2137	46
EGR1	9040	9016	14	13.7068	83		ELF1	11264	8084	13	13.4127	54		MAFK	637	725	15	13.4249	47
ELF1	8523	6463	13	12.9614	57		ELK1	1758	1757	10	11.668	68		MAX	4089	4067	10	12.6057	58
ELK1	2768	2749	10	11.5928	67		ETS1	1316	929	15	12.7157	61		MYC	1636	1618	10	12.8414	65
ETS1	656	623	15	13.6238	60		FOS	3462	3461	11	14.182	45		NRF1	3941	3941	11	14.8647	81
GABPA	4226	4159	11	13.2026	67		FOSL1	8914	7247	11	14.4184	48		RFX5	284	282	15	13.8601	60
JUND	1152	1152	11	13.5689	38		GABPA	6791	4515	11	12.8222	66		SP1	9400	9400	11	13.6609	82
MAX	2559	2228	10	12.2905	59		GATA1	2002	1994	11	13.4858	39		SP2	1446	1446	15	14.4739	83
MEF2A	710	698	15	13.8829	19		GATA2	4390	3360	14	13.3382	38		TCF12	3007	3007	11	12.5411	64
MEF2C	572	556	15	14.2615	21		JUN	1784	1578	13	13.0795	45		USF1	7154	7154	11	13.3747	57
MYC	1162	1130	10	12.6997	65		JUND	7495	7495	11	14.1051	46		USF2	4882	4804	11	13.875	58
NFYB	701	704	15	16.1762	49		MAFF	202	215	18	13.5718	42		YY1	5773	6370	12	14.1297	53
NRF1	4653	4636	11	14.2134	82		MAFK	1263	1264	15	13.6565	42		ZNF143	175	159	20	7.92002	63
PAX5	820	823	19	14.2756	59		MAX	5302	5302	10	12.6222	58
POU2F2	2714	2715	13	14.9927	27		MEF2A	283	266	15	15.1122	24
RELA	6329	6329	10	12.9462	60		MYC	5182	5182	10	12.8346	61
RFX5	319	274	15	13.3579	63		NFYA	329	339	18	21.2544	53
SP1	10037	10037	11	13.5402	83		NFYB	1025	1025	15	16.5859	48
SPI1	4855	4857	15	13.8186	49		NRF1	3497	3494	11	14.5837	81
STAT5A	1116	1116	11	12.7263	43		RFX5	165	141	15	13.3173	62
TCF12	8778	8732	11	12.7561	63		SP1	5194	5194	11	13.9706	85
TCF3	5011	5012	11	12.7785	65		SP2	1565	1564	15	14.5168	83
USF1	6014	4551	11	13.6661	60		SPI1	4091	4092	15	14.8089	49
USF2	5378	4662	11	13.4333	58		STAT1	1330	1330	11	14.8425	43
YY1	4358	4358	12	13.4089	51		STAT5A	2549	2549	11	13.8728	39
ZBTB33	180	159	15	14.1221	54		THAP1	928	928	9	9.78025	75
ZEB1	2655	2653	9	13.2084	64		USF1	5537	5537	11	13.6736	57
ZNF143	132	132	20	10.4059	58		USF2	2436	2035	11	14.1272	59
							YY1	4733	4733	12	14.2632	53
							ZBTB33	264	279	15	13.9245	59
							ZNF143	149	112	20	4.20566	61
							ZNF263	194	194	21	25.7714	67

## Sheet: Supplemental Table 4
Supplemental Table S4: Model performances in three cell lines.
GM12878				K562				H1-hESC
TF	AUROC of L2-regularized MLR models			TF	AUROC of L2-regularized MLR models			TF	AUROC of L2-regularized MLR models
Dataset	seq.shape	seq.shape.HM		Dataset	seq.shape	seq.shape.HM		Dataset	seq.shape	seq.shape.HM
BATF	0.7681	0.7889		BHLHE40	0.6377	0.67		CEBPB	0.7364	0.7482
BHLHE40	0.6114	0.6756		CEBPB	0.7689	0.7743		CTCF	0.6949	0.6983
CEBPB	0.5258	0.6763		CTCF	0.6943	0.6937		EGR1	0.6514	0.6881
CTCF	0.6897	0.6908		E2F4	0.661	0.7181		GABPA	0.7309	0.7929
E2F4	0.7215	0.777		E2F6	0.6788	0.6899		JUN	0.5856	0.6348
EBF1	0.7588	0.781		EGR1	0.6627	0.684		JUND	0.6947	0.7626
EGR1	0.6339	0.6918		ELF1	0.753	0.7832		MAFK	0.7549	0.7485
ELF1	0.7118	0.7531		ELK1	0.7315	0.7742		MAX	0.6768	0.7417
ELK1	0.703	0.7387		ETS1	0.6167	0.7051		MYC	0.7446	0.813
ETS1	0.5322	0.6367		FOS	0.6619	0.7359		NRF1	0.8827	0.9065
GABPA	0.7406	0.7903		FOSL1	0.7424	0.7906		RFX5	0.6045	0.6065
JUND	0.7054	0.807		GABPA	0.7835	0.8022		SP1	0.6561	0.7369
MAX	0.6669	0.7547		GATA1	0.6346	0.7311		SP2	0.6877	0.7822
MEF2A	0.6056	0.6647		GATA2	0.64	0.7516		TCF12	0.617	0.6971
MEF2C	0.5924	0.6833		JUN	0.59	0.6712		USF1	0.7674	0.7872
MYC	0.713	0.8131		JUND	0.7092	0.7323		USF2	0.7901	0.8094
NFYB	0.7916	0.7961		MAFF	0.7905	0.7933		YY1	0.7307	0.7847
NRF1	0.8434	0.8634		MAFK	0.7933	0.787		ZNF143	0.7546	0.7542
PAX5	0.5832	0.6428		MAX	0.7379	0.7512
POU2F2	0.6543	0.696		MEF2A	0.639	0.6357
RELA	0.727	0.8089		MYC	0.7054	0.7727
RFX5	0.6375	0.6506		NFYA	0.7739	0.7722
SP1	0.6276	0.7112		NFYB	0.8309	0.826
SPI1	0.6624	0.6958		NRF1	0.8616	0.8835
STAT5A	0.5951	0.6877		RFX5	0.6509	0.6515
TCF12	0.5792	0.692		SP1	0.6633	0.6943
TCF3	0.5375	0.7016		SP2	0.7049	0.7346
USF1	0.784	0.7999		SPI1	0.6542	0.6781
USF2	0.7322	0.7726		STAT1	0.7332	0.7513
YY1	0.6954	0.7235		STAT5A	0.7441	0.8029
ZBTB33	0.5833	0.5794		THAP1	0.6126	0.6624
ZEB1	0.6578	0.695		USF1	0.7603	0.7594
ZNF143	0.6992	0.7112		USF2	0.7697	0.7952
				YY1	0.7823	0.7948
				ZBTB33	0.6414	0.6594
				ZNF143	0.697	0.6961
				ZNF263	0.8564	0.8565
